# Supplementary material
Source: PubMed Central journal article supplement (PMC3951242)
Supplement: NIHMS544673-supplement-Supplemental_Fig_1_and_Supp_Table_1.pdf [file NIHMS544673-supplement-Supplemental_Fig_1_and_Supp_Table_1.pdf]

# Supplemental Table I

| <u>Treatment</u>          | <u>Strain</u> | <u>pre-treatment weight (g)</u> | <u>pre-treatment SBP (mmHg)</u> | <u>pre-treatment DBP (mmHg)</u> | <u>pre-harvest weight (g)</u> | <u>treatment SBP (mmHg)</u> | <u>treatment DBP (mmHg)</u> | <u>serum aldosterone (nM)</u> |
|---------------------------|---------------|---------------------------------|---------------------------------|---------------------------------|-------------------------------|-----------------------------|-----------------------------|-------------------------------|
| vehicle + control IgG     | C57Bl/6       | 24.0 0.5                        | 111.0 1.3                       | 81.1 1.1                        | 26.0 0.5                      | 106.0 2.8                   | 76.5                        | 1.6 0.20                      |
| aldosterone + control IgG | C57Bl/6       | 25.0 0.5                        | 109.0 4.2                       | 82.0 2.8                        | 25.3 0.6                      | 115.4 5.0                   | 78.1 4.7                    | 9.8 2.3*                      |
| vehicle + VEGFR1 ab       | C57Bl/6       | 23.7 0.3                        | 97.9 3.8                        | 71.4 3.4                        | 25.1 0.3                      | 101.2 4.6                   | 71.9 4.28                   | 1.2 0.07                      |
| aldosterone + VEGFR1 ab   | C57Bl/6       | 24.0 0.3                        | 103.5 1.3                       | 74.1 1.9                        | 25.9 0.5                      | 102.5 2.6                   | 74.4 2.5                    | 7.9 1.8*                      |
| vehicle + VEGFR2 ab       | C57Bl/6       | 25.7 0.7                        | 113.3 1.6                       | 77.43 2.5                       | 26.2 0.7                      | 111.8 7.9                   | 87.0 9.6                    | 1.9 0.51                      |
| aldosterone + VEGFR2 ab   | C57Bl/6       | 27.2 0.6                        | 88.9 3.1                        | 62.8 3.0                        | 27.8 0.6                      | 109.7 3.5                   | 88.4 5.1                    | 8.4 2.1*                      |

**Supplemental Table I:** Increased serum aldosterone levels in aldosterone-infused mice treated with control IgG, VEGFR1-blocking antibody (ab), or VEGFR2-blocking ab with no change in blood pressure or animal weight. SBP=systolic blood pressure, DBP=diastolic blood pressure. \* = P<0.05 vs vehicle.

# Supplemental Figure I

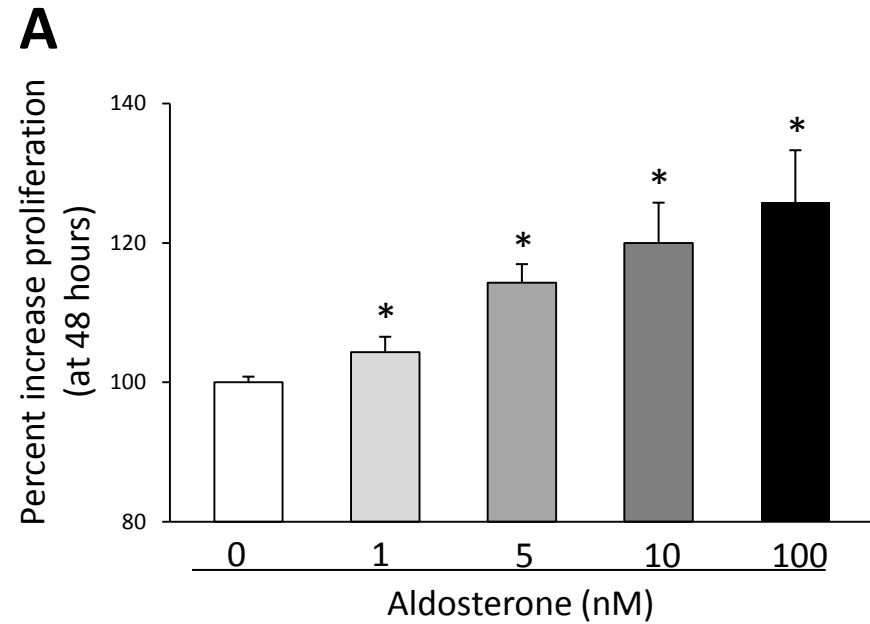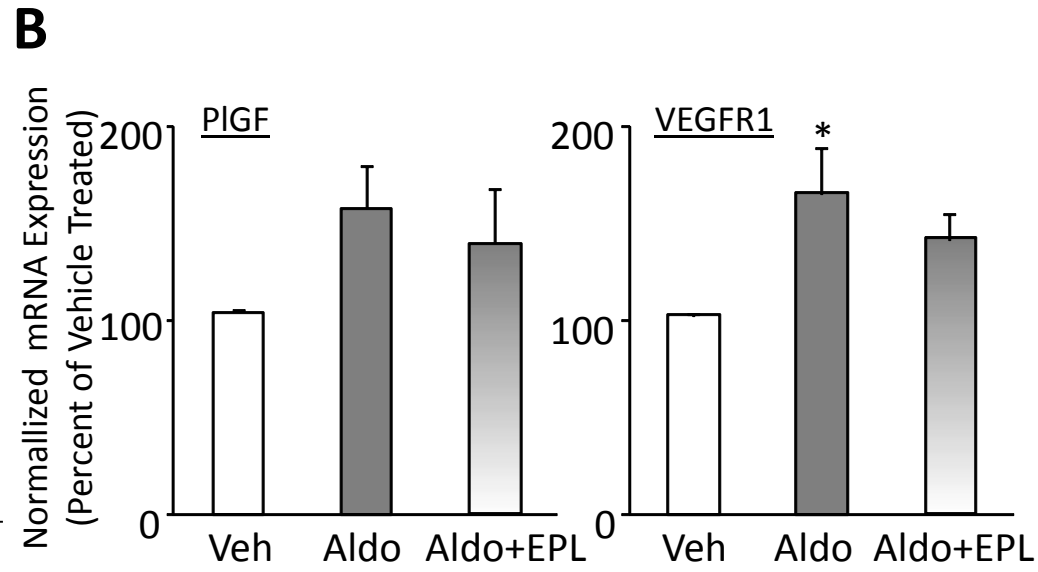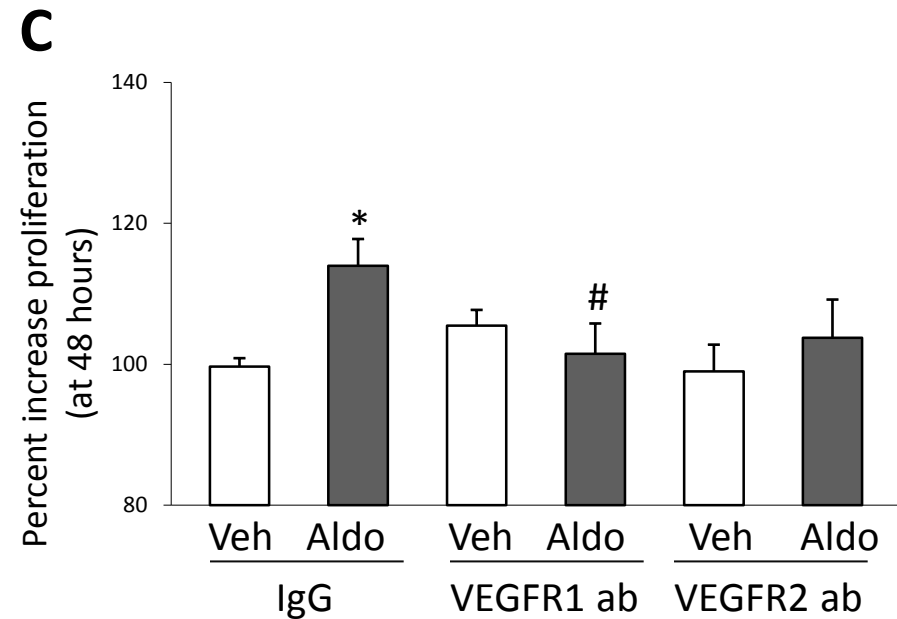

## Supplemental Figure I: Role of PIGF and VEGFR1 in aldosterone-enhanced carotid SMC proliferation *in vitro*.

**(A)** Primary mouse carotid SMC were treated *in vitro* with aldosterone (Aldo) at the indicated concentration and the percent increase in SMC proliferation compared to vehicle-treated cells was quantified after two days. N=6-7 experiments. \*P<0.01 versus 0 nM Aldo. **(B)** Mouse carotid SMC treated with vehicle, Aldo (10nM), or Aldo + eplerenone (EPL, 1µM) for 8 hours. PIGF and VEGFR1 mRNA expression were quantified by QRT-PCR. N=5-8 experiments. \*P<0.05 versus vehicle. **(C)** Mouse carotid SMC treated with Aldo (10nM) or vehicle (Veh) in the presence of control IgG, VEGFR1- or VEGFR2-blocking antibodies (ab) for 2 days. Bars represent the average percent increase in SMC proliferation compared to Veh with control IgG treatment. N=8 experiments. \* P<0.05 versus all Veh-treated, # P<0.05 versus Aldo-treated with IgG.
